# Supplementary material for: High-resolution silkworm pan-genome provides genetic insights into artificial selection and ecological adaptation
Source: PubMed Central journal article supplement (PMC9509368; doi:10.1038/s41467-022-33366-x), 2022-09-24
Supplement: 41467_2022_33366_MOESM1_ESM.pdf [file 41467_2022_33366_MOESM1_ESM.pdf]

## Supplementary Information

High-resolution silkworm pan-genome provides genetic insights into artificial selection and ecological adaptation

Tong X. *et al.*

This file includes Supplementary Figs. 1 to 7

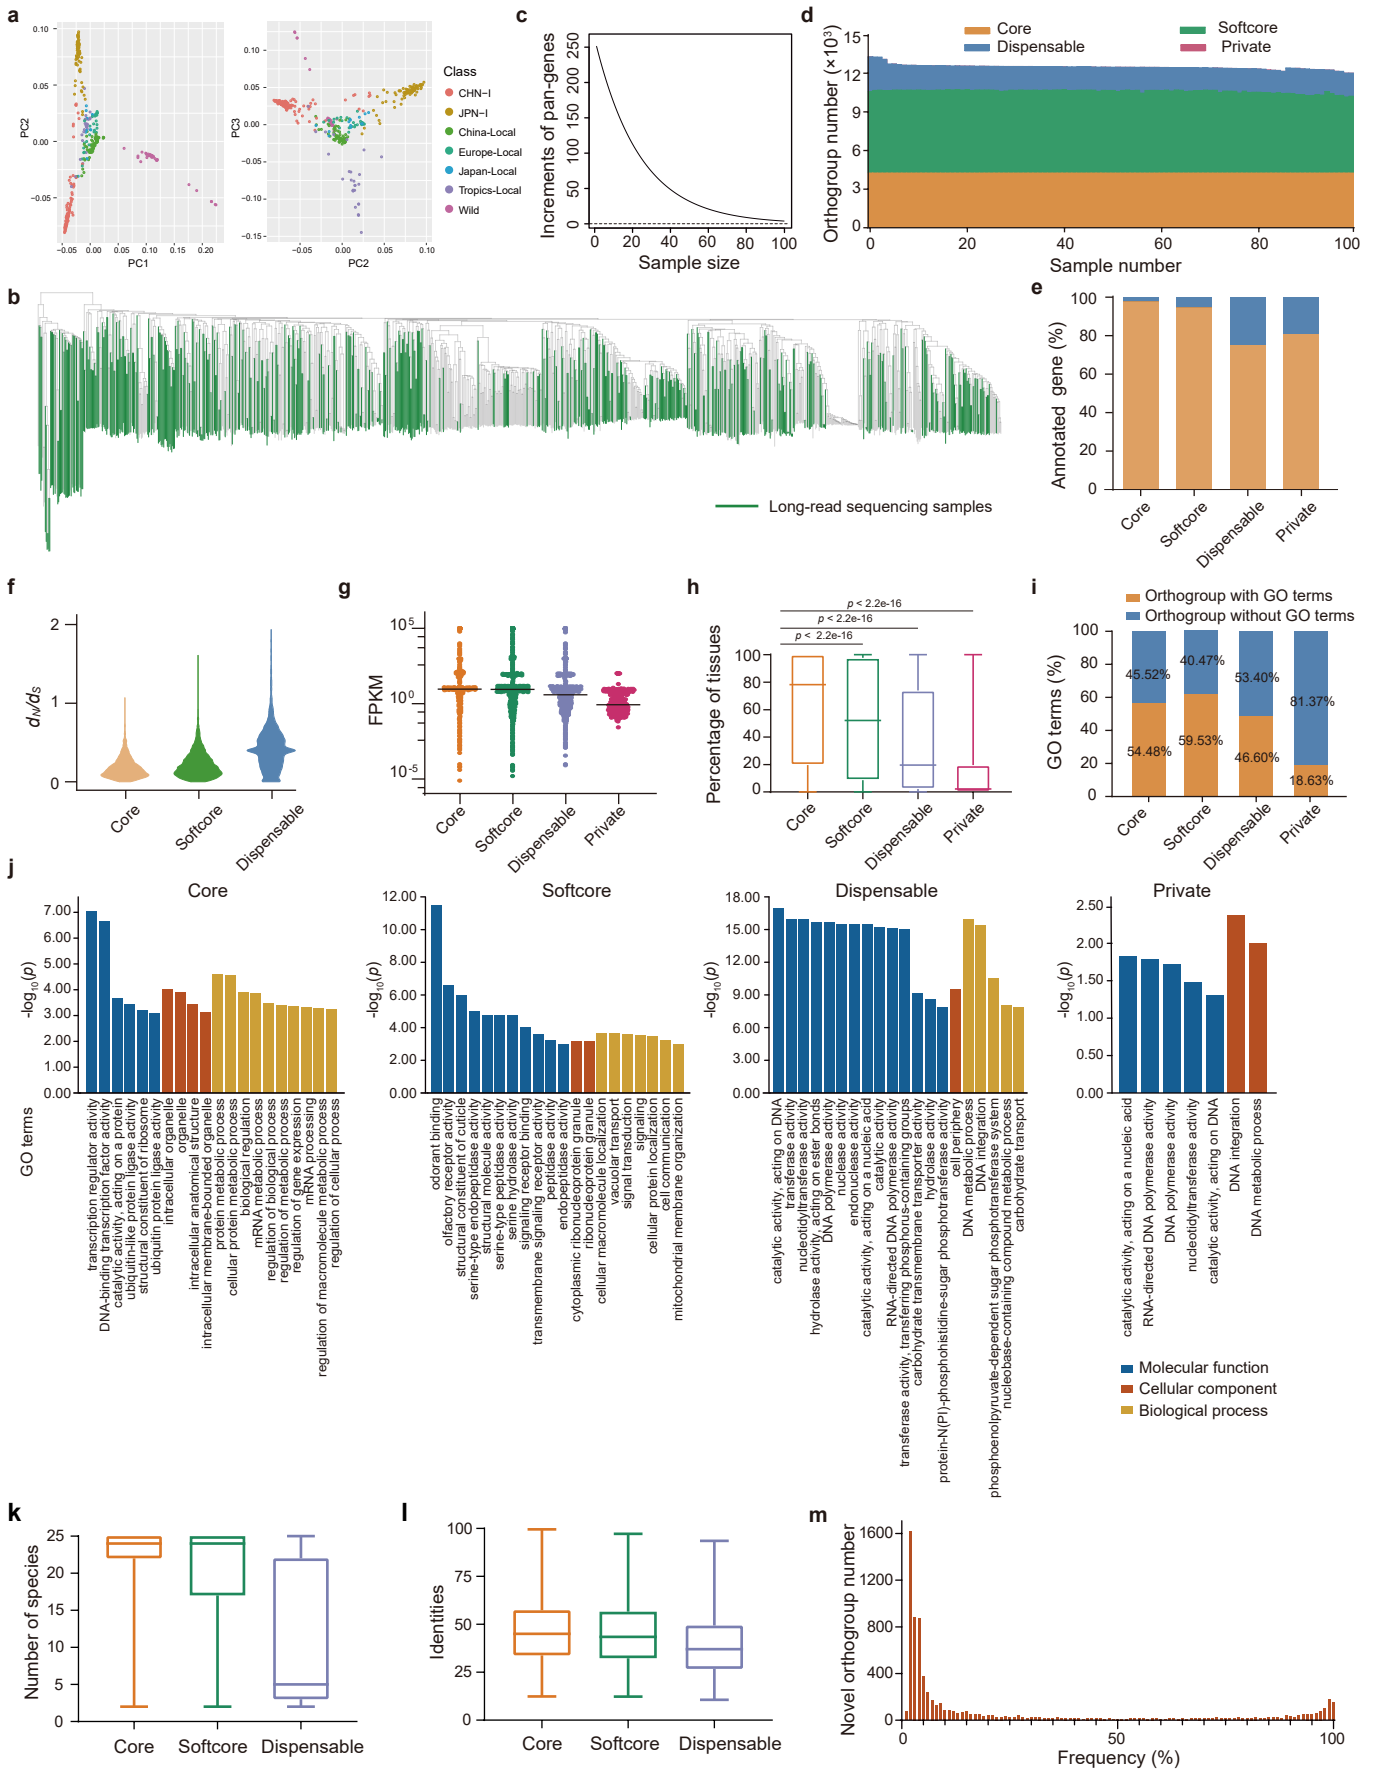

**Supplementary Fig. 1 | Pan-gene analysis of 100 silkworm genomes. a**, PCA of seven silkworm populations. **b**, Phylogenetic tree of the samples (545) used to perform long-read sequencing (green). **c**, Evaluation of pan-gene plateau. Derivative curve of fitted curve. **d**, The counts of core, softcore,

dispensable, and private gene clusters in each of the 100 genomes. **e**, Proportion of genes with (orange) and without (blue) InterPro domains annotation in the four clusters. **f**,  $d_N/d_S$  values of genes in core, softcore, and dispensable groups. **g** and **h**, The expression of core, softcore, dispensable, and private genes. Core genes expressed at a higher level (**h**) and in more tissues (**i**) than dispensable and private genes. Student's *t*-test (two-tailed). **i**, The percentages of core, softcore, dispensable, and private genes with and without GO annotation. **j**, Top 20 of GO enrichment terms of core, softcore, dispensable, and private genes. Silkworm core genes show the widest distribution (**k**) and the highest sequence identity (**l**) among 24 insects in 10 orders. **m**, Frequency distribution of newly identified genes in the 100 annotated genomes. Horizontal lines within boxes indicate the medians, box boundaries indicate the 1<sup>st</sup> and 3<sup>rd</sup> quartiles, and whiskers indicate the minima and maxima.

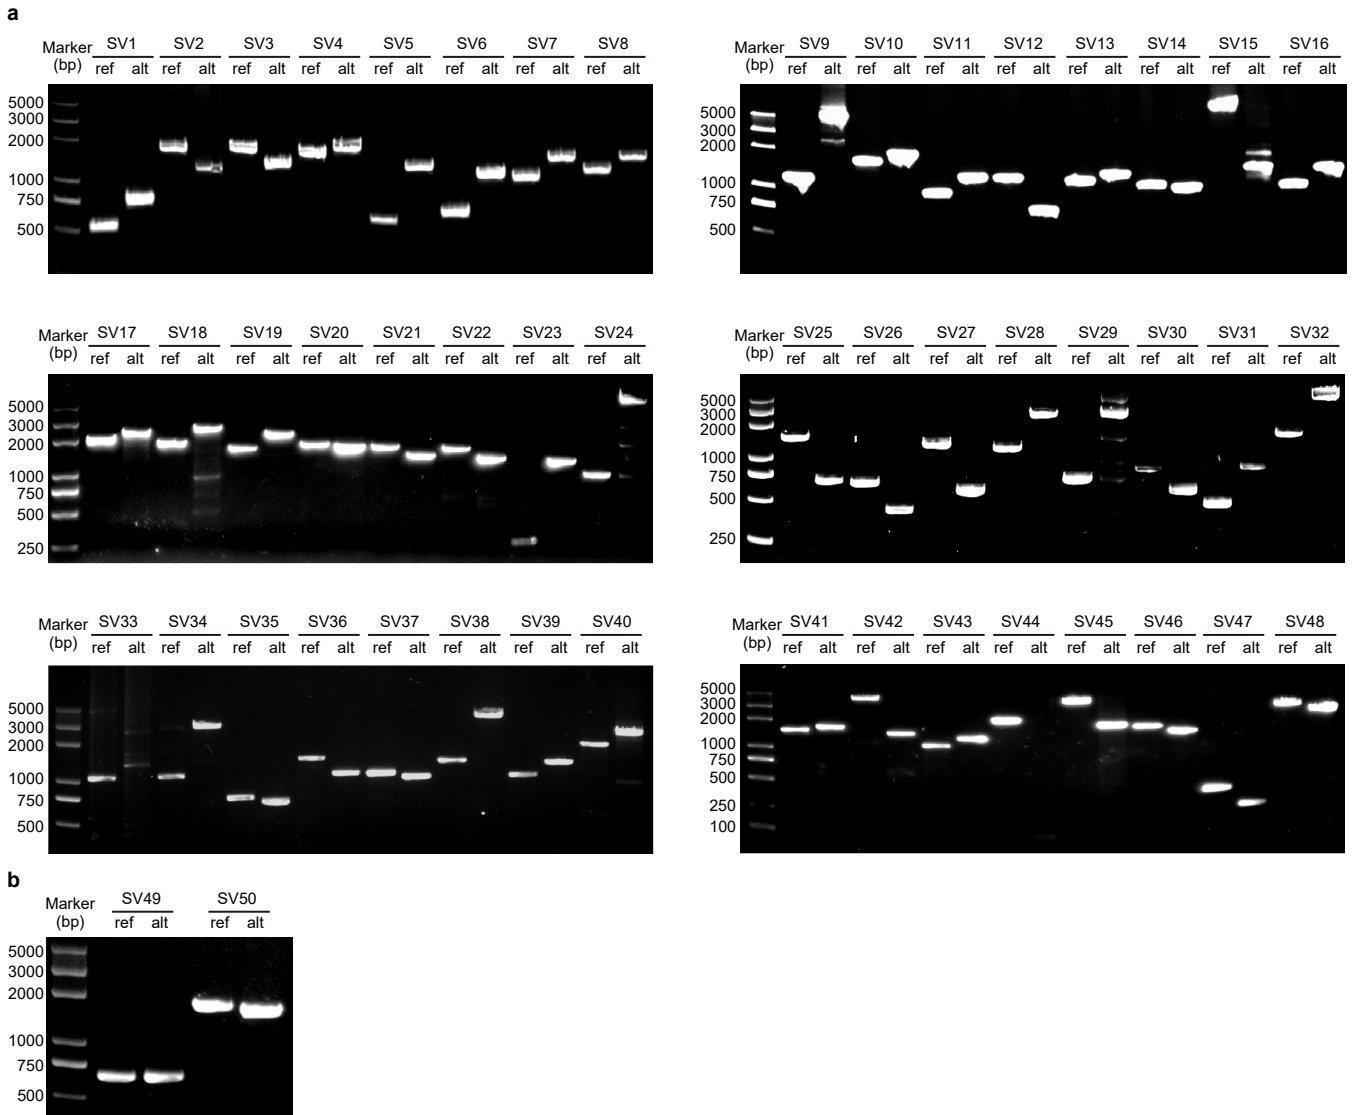

**Supplementary Fig. 2 | SV verification.** We randomly selected 50 SVs from the non-redundant SV set to evaluate accuracy of SV calling. We amplified those SVs using PCR and show DNA bands using agarose gel electrophoresis. **a**, 48 SVs verified as positive calling. **b**, Two SVs confirmed as negative calling. “ref” and “alt” represent reference genome and altered genome. The experiment was repeated twice with consistent results. Source figures are provided as a Source Data file.



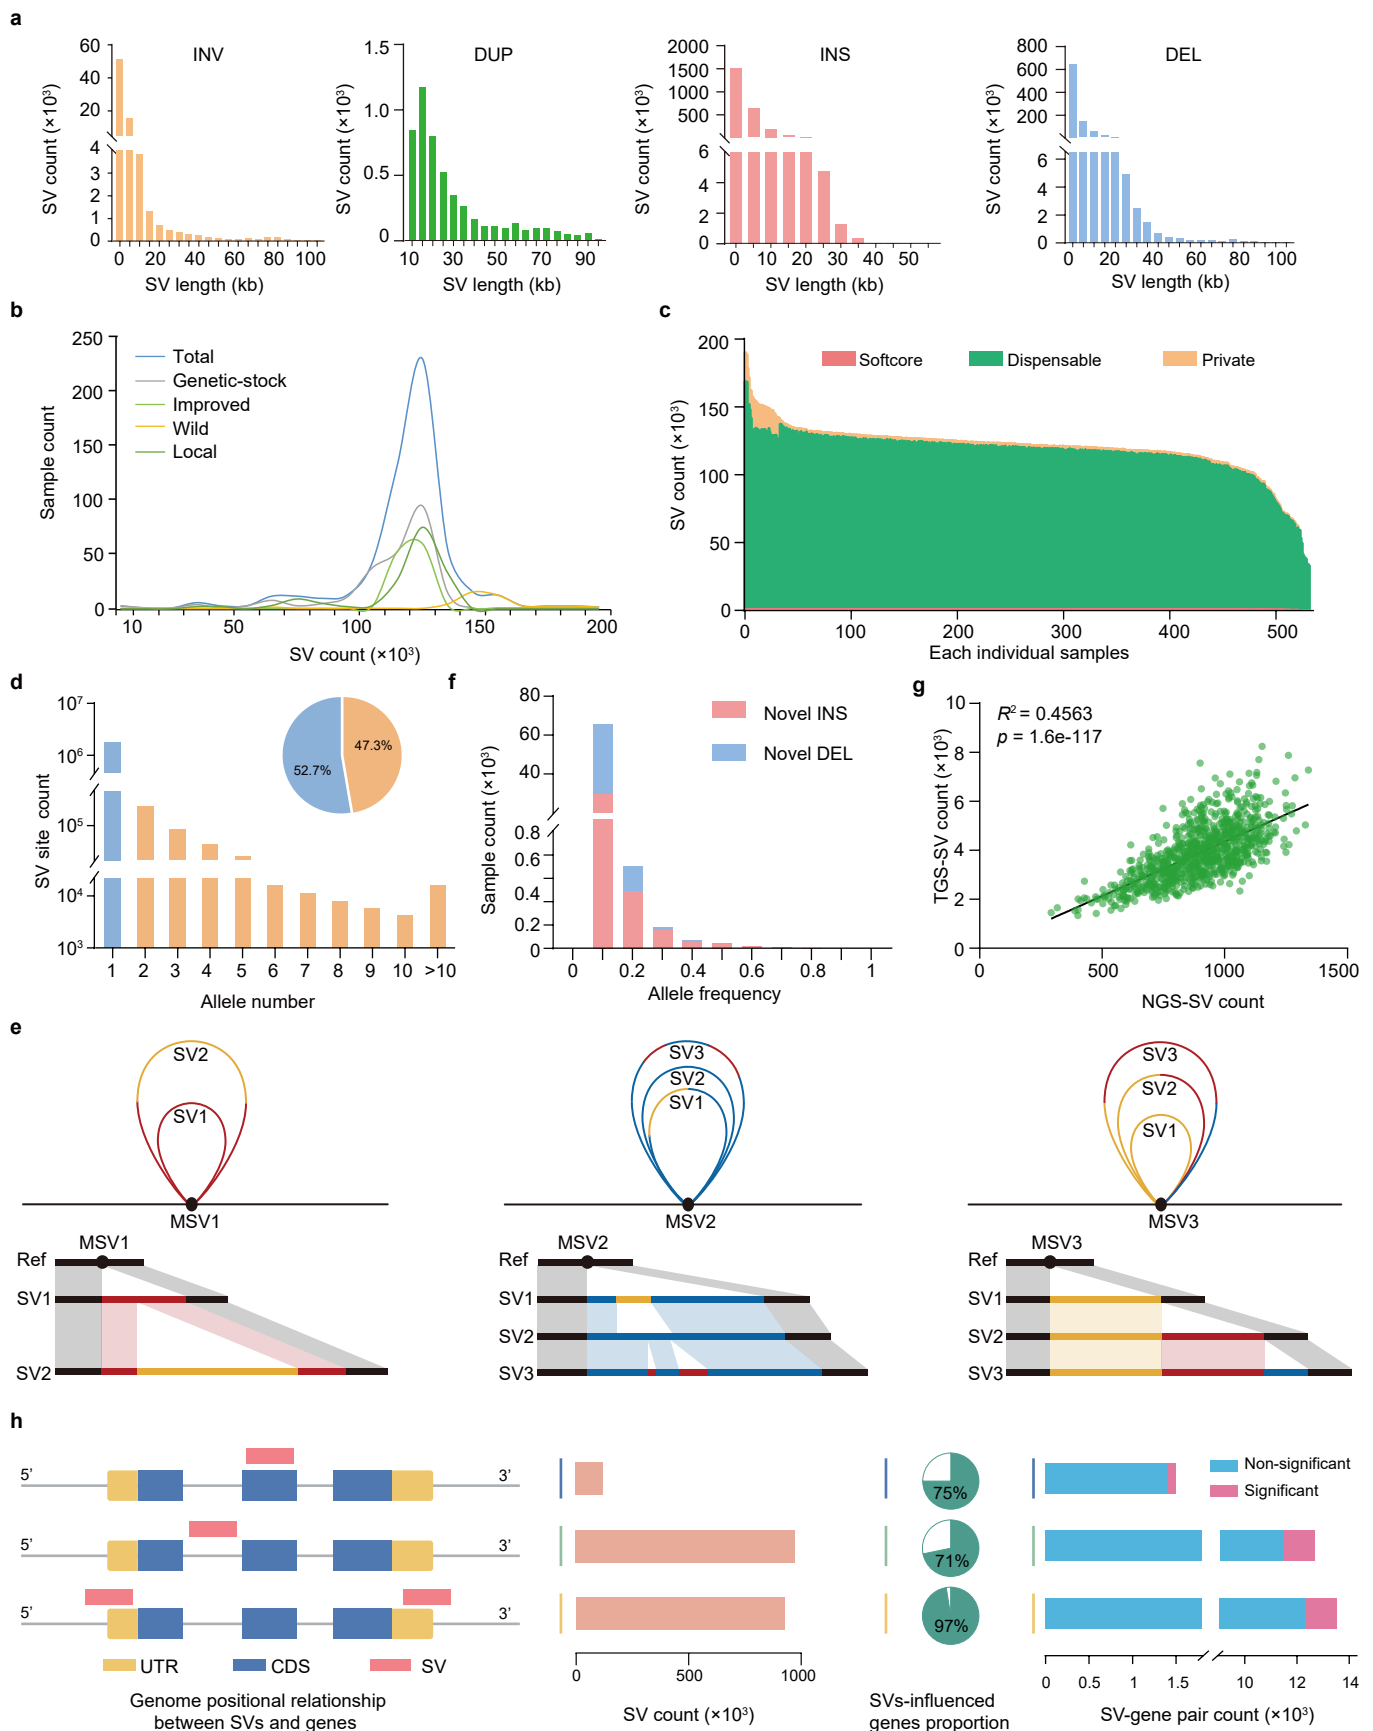

**Supplementary Fig. 3 | Characterization of pan-SVs in 545 silkworm genomes.** **a**, The distribution of insertion (INS), deletion (DEL), inversion (INV), and duplication (DUP) lengths. **b**, Line chart showing the sample count distribution with different SV count. **c**, The counts of softcore, private, and dispensable SVs for each of the 545 genomes. **d**, Single or multiple SV (MSV, ranging from 2 to 135) alleles found in

a certain genomic site. Histogram shows SV site counts with different allele numbers. The pie chart shows the proportions of SV sites with single (blue) and multiple (yellow) alleles. **e**, Schematic diagrams of genomic sites with MSV alleles and their collinearity. **f**, Allele frequencies of novel SVs newly identified in 537 NGS sequenced samples by mapping short reads against the graph-based pan-genome. **g**, Correlations of SV count distribution along chromosomes between TGS-SV and NGS-SV. The TGS-SVs were identified in the long-read sequenced genomes and the NGS-SVs were identified by mapping short reads of the 537 NGS sequenced samples to the graph-based pan-genome. SVs were counted on uninterrupted 500 kb windows along chromosomes. Linear regression, Pearson's  $r = 0.6755$ ,  $R^2 = 0.46$ ,  $p = 1.6e-117$ , F-test, source data are provided as a Source Data file. **h**, SV impact on genes. SV count (middle) in the corresponding region (left) and their impact on gene expression (right histogram). The pie charts show the proportion of genes influenced by SVs.

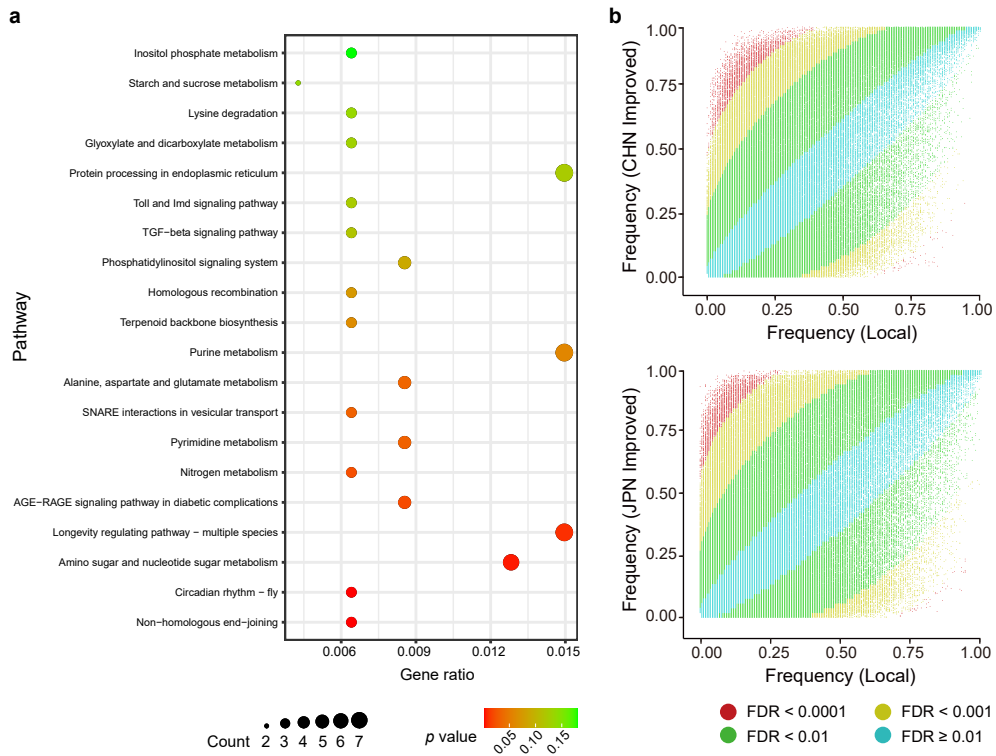

**Supplementary Fig. 4 | KEGG enrichment of domestication-associated genes and SV frequencies in local and improved silkworms. a.** KEGG pathway enrichment of domestication-associated genes. **b.** Allele frequencies of SVs in local and improved silkworms.

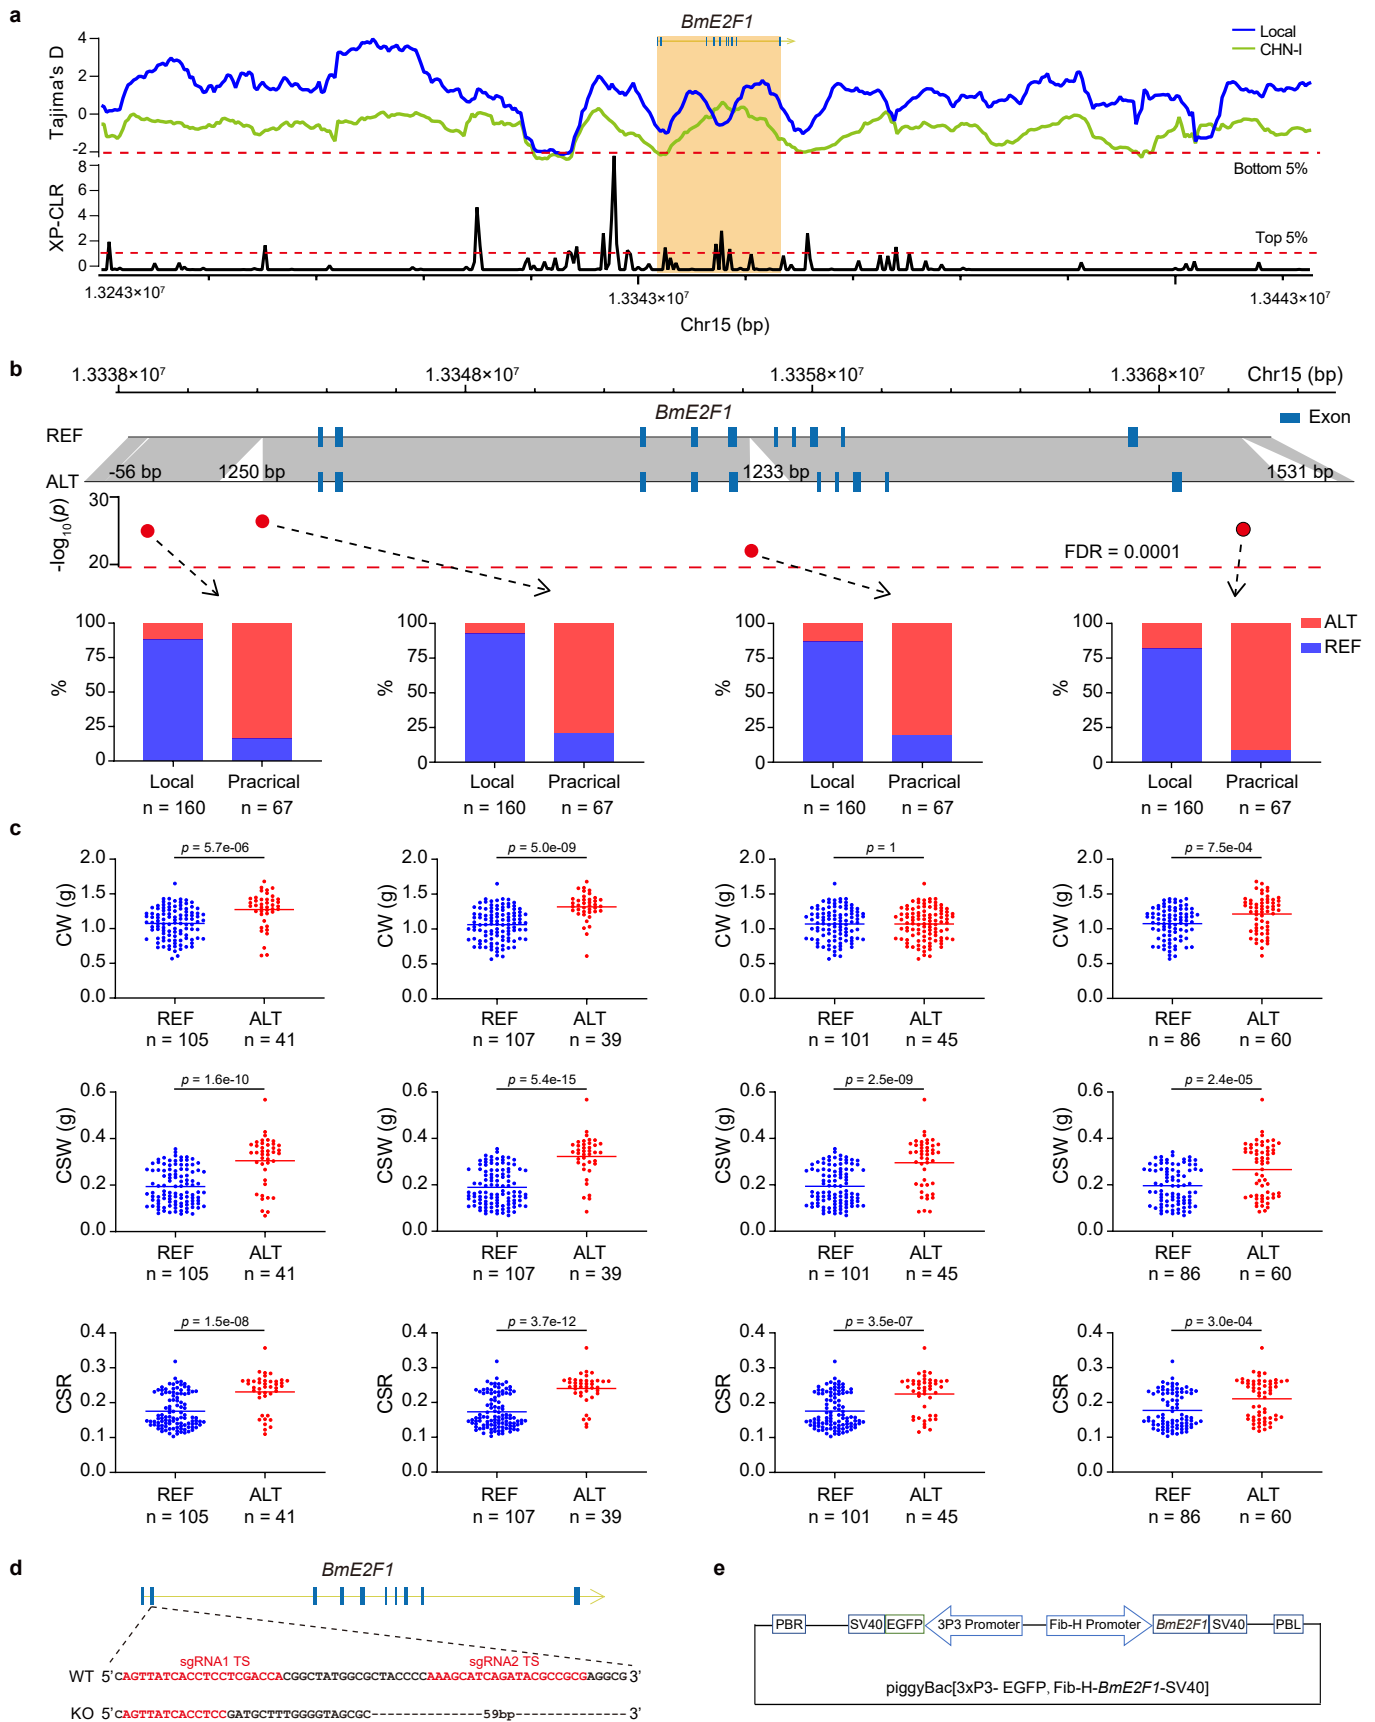

**Supplementary Fig. 5 | Analysis of *BmE2F1* and relevant SVs.** **a**, Signature of positive selection between local and CHN-I silkworms in the genomic region of the *BmE2F1* gene using Tajima's D and XP-CLR based selective sweep analysis. **b**, Four SVs with significant frequency divergence in the genomic region of *BmE2F1* between local and CHN-I silkworms. **c**, The cocoon weight (CW), cocoon

shell weight (CSW), and cocoon shell ratio (CSR) between strains with and without the four SVs. The line indicates the mean, Student's *t*-test (two-tailed). The line indicates the mean. **d**, CRISPR-cas9 mediated knockout of *BmE2F1*. **e**, Overexpression vector of *BmE2F1*. Source data are provided as a Source Data file.

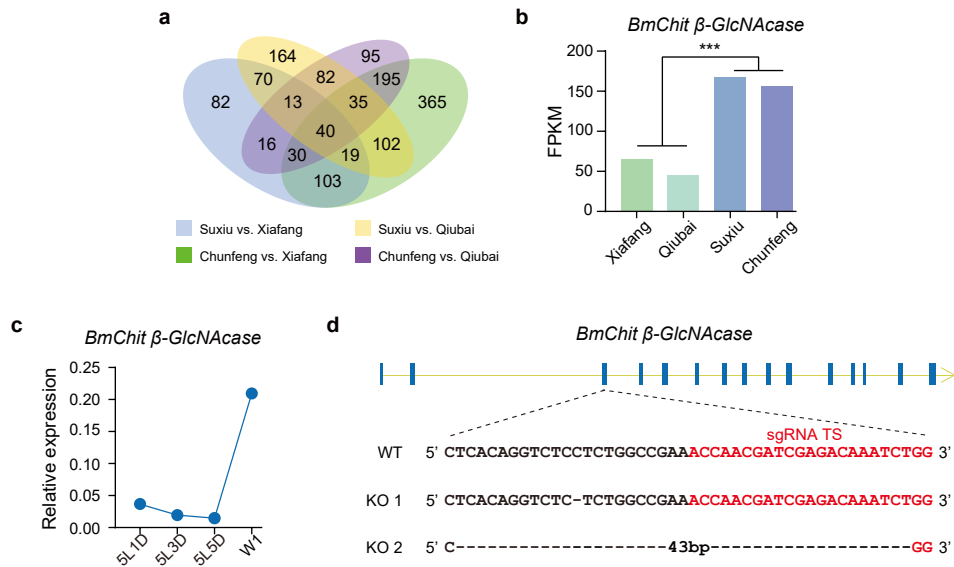

**Supplementary Fig. 6 | Identification and analysis of a silk fineness related gene.** **a**, Differential expressed genes (DEGs) between fine silk and coarse silk strains. **b**, The expression of *BmChit*  $\beta$ -GlcNAcase among the four strains. \*\*\*,  $p = 0.0117$ , Student's  $t$ -test (two-tailed). **c**, The expression profile of the *BmChit*  $\beta$ -GlcNAcase gene in silk press from the first day of fifth instar to the wandering stage (a stage at the start of spinning). **d**, CRISPR-cas9 mediated knockout of *BmChit*  $\beta$ -GlcNAcase. Source data are provided as a Source Data file.

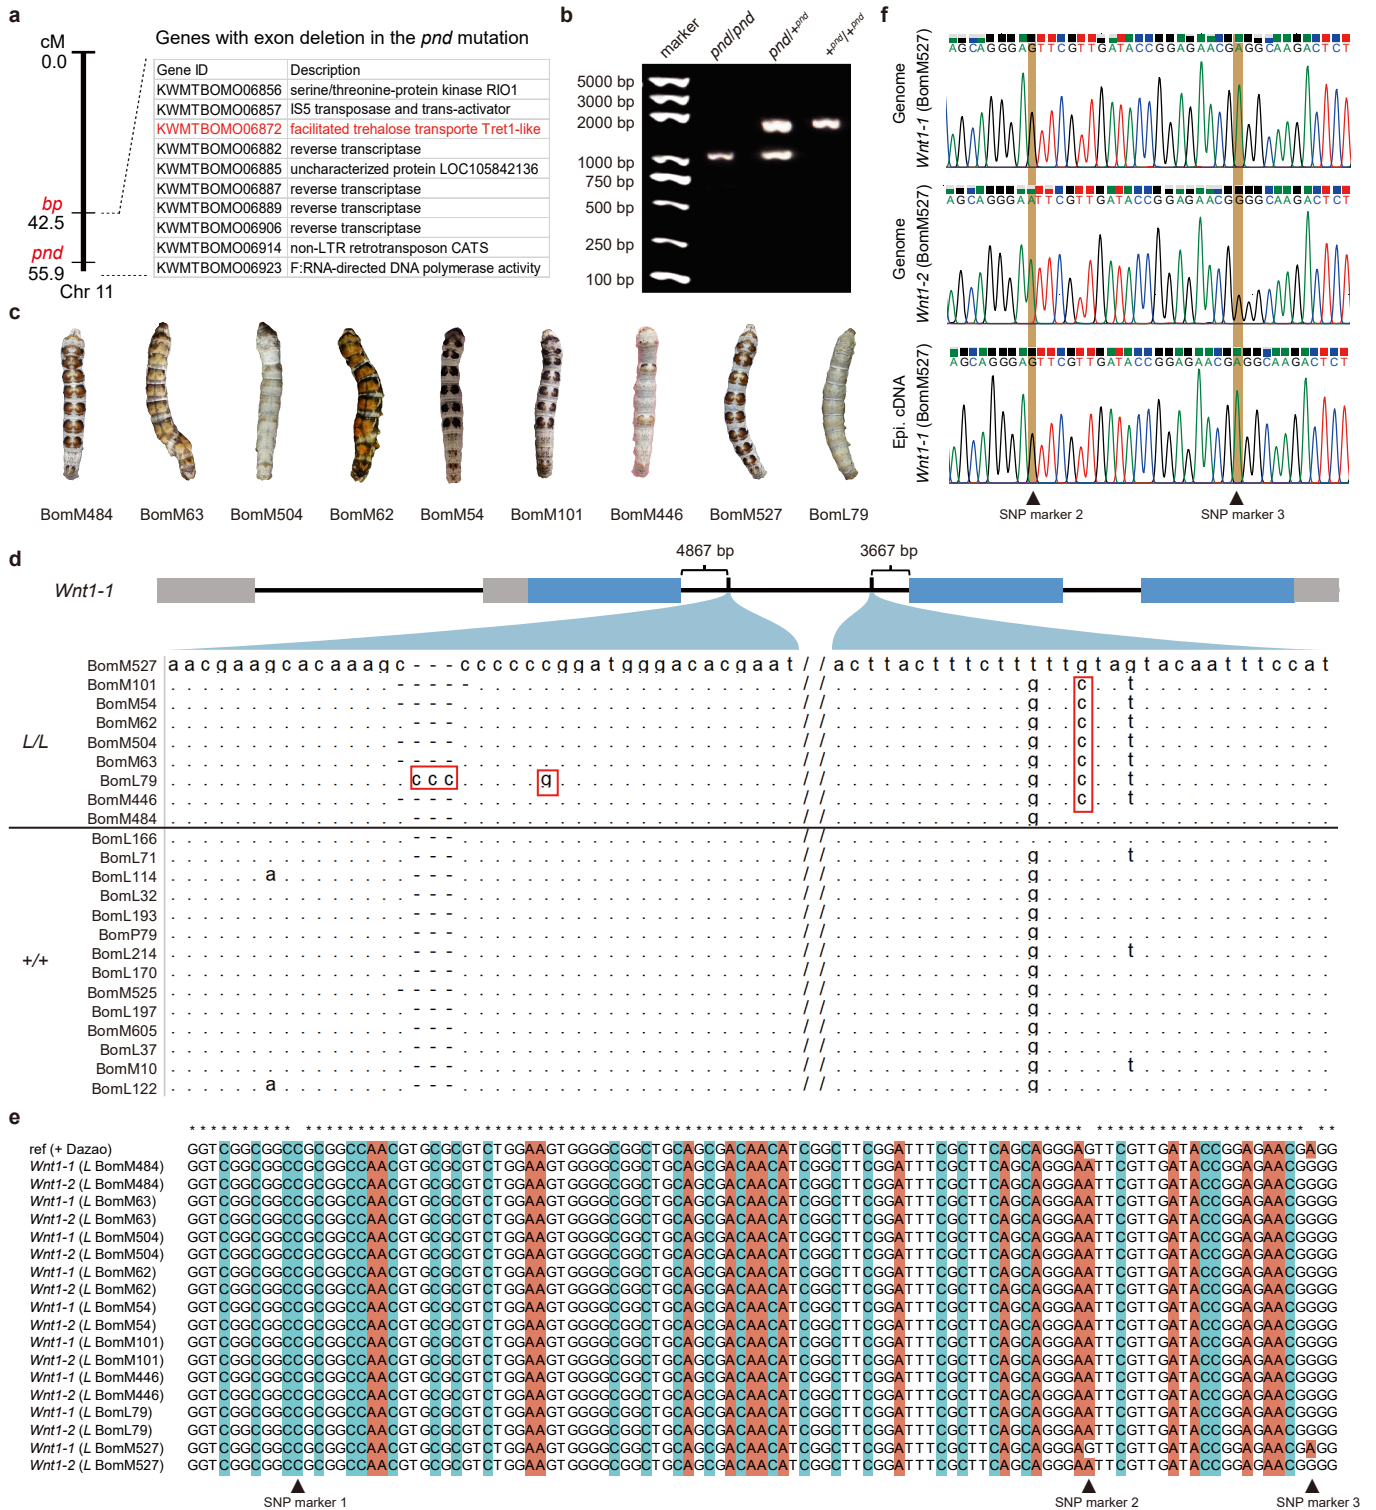

**Supplementary Fig. 7 | The analysis of genes and variations in *pnd* and *L*.** **a**, Genes with exonic variation in the *pnd* mutation. **b**, PCR gel image of *BmTret1-like* 3'UTR in *pnd/pnd*, *pnd/+*, and *+/+*. **c**, Phenotypes of nine *L* strains. The experiment was repeated twice with consistent results. Source figure is provided as a source data file. **d**, Variations in *Wnt1-1* gene region and its flanking 20 kb region. “.” represents the same nucleotide as the first line, “-” represents gap or deletion in the corresponding position. The red boxes show the three variations that are specifically present but not fixed in the *L* strains. **e**, Multiple sequence alignment of *Wnt1*. The three black triangles indicate the three SNP markers previously identified in *Wnt1*. The *Wnt1-1* and *Wnt1-2* in *L* strain BomM527 are distinguished by SNP markers 2 and 3. **f**, Verification of two SNPs (markers 2 and 3) between *Wnt1-1* and *Wnt1-2* in the BomM527 genome using PCR and Sanger sequencing (based on the SNP waveform in the Sanger sequence). *Wnt1-1* is specifically expressed in the epidermis in the *L* strain (BomM527).
