# Supplementary material for: High-resolution silkworm pan-genome provides genetic insights into artificial selection and ecological adaptation
Source: PubMed Central journal article supplement (PMC9509368; doi:10.1038/s41467-022-33366-x), 2022-09-24
Supplement: 41467_2022_33366_MOESM3_ESM.pdf [file 41467_2022_33366_MOESM3_ESM.pdf]

## Description of Additional Supplementary Files

**File name: Supplementary Data 1**

Description:

Information and NGS sequencing summary of the 1,078 samples

**File name: Supplementary Data 2**

Description:

Summary of ONT sequencing and structural variations of 545 genomes

**File name: Supplementary Data 3**

Description:

Genome assembly, annotation and pan-gene statistics of the 100 assembled genomes

**File name: Supplementary Data 4**

Description:

Comprehensive pan-genome sequence content and gene annotation

**File name: Supplementary Data 5**

Description:

List of the species used for investigating the similarity and distribution of core, softcore, and dispensable genes among insects

**File name: Supplementary Data 6**

Description:

Nine previously reported SVs were validated in this study

**File name: Supplementary Data 7**

Description:

The primer sequences used in the SV validation experiments

**File name: Supplementary Data 8**

Description:

8a: Genes and relevant SVs associated with silkworm domestication

8b: Genes and relevant SVs associated with silkworm improvement

**File name: Supplementary Data 9**

Description:

Lists of the primers, sgRNAs, and siRNAs used in this study
